# Supplementary material
Source: Elsevier journal article supplement (https://www.sciencedirect.com/science/article/pii/S2387020621000681)
Supplement: mmc1 [file S2387020621000681:mmc1.doc]

**Anexo 1:** Miembros del grupo español del HTLV y VIH-2

C. Rodríguez, M. Vera, O. Ayerdi & J. del Romero (Centro Sanitario Sandoval, Madrid); G. Marcaida & M.D. Ocete (Hospital General Universitario, Valencia); E. Caballero (Hospital Vall d’Hebrón, Barcelona); A. Aguilera, J.J. Rodríguez-Calviño, D. Navarro, C. Rivero & M.D. Vilariño (Hospital Conxo-CHUS, Santiago); R. Benito & J. Sahagún (Hospital Clínico Universitario Lozano Blesa, Zaragoza); R. Ortiz de Lejarazu & S. Rojo (Hospital Clínico Universitario, Valladolid); J.M. Eirós, M. Domíngez-Gil (Hospital Rio Hortega, Valladolid); C. Manzardo & J.M. Miró (Hospital Clínic-IDIBAPS, Barcelona); J. García (Hospital Cristal-Piñor, Orense); E. Calderón (Hospital Virgen del Rocío & CIBERESP, Sevilla); D. Escudero (Hospital Germans Trias i Pujol, Barcelona); M. Trigo, J. Diz & M. García-Campello (Complejo Hospitalario, Pontevedra); M. Rodríguez-Iglesias (Hospital Universitario, Puerto Real); A. Hernández-Betancor & A.M. Martín (Hospital Insular Hospital Universitario, Las Palmas de Gran Canaria); J.M. Ramos & A. Gimeno (Hospital Universitario, Alicante); C. Gómez-Hernando (Complejo Hospitalario Virgen de la Salud, Toledo); G. Cilla & E. Pérez-Trallero (Hospital Donostia, San Sebastián); L. Fernández-Pereira (Hospital San Pedro de Alcántara, Cáceres); M. Hernández, A.M. López-Lirola & J.L. Gómez-Sirvent (Hospital Universitario La Laguna, Tenerife); L. Force (Hospital General, Mataró); C. Cifuentes (Hospital Son Llátzer, Palma de Mallorca); S. Pérez & L. Morano (Hospital do Meixoeiro, Vigo); C. Raya (Hospital del Bierzo, Ponferrada); A. González-Praetorius (Hospital Universitario, Guadalajara); M. Peñaranda (Hospital Son Espases, Mallorca); L. Roc (Hospital Miguel Servet, Zaragoza); I. Viciana (Hospital Virgen de la Victoria, Málaga); T. Cabezas (Hospital Torredecárdenas, Almeria); A. Lozano, E. Fernández-Fuertes & J.M. Fernández (Hospital de Poniente, Almería); I. García-Bermejo & G. Gaspar (Hospital Universitario, Getafe); M. Valeiro, L. Pérez & T. Aldamiz (Hospital Gregorio Marañón, Madrid); N. Margall (Hospital Santa Creu i Sant Pau, Barcelona); S. Sauleda & M. Pirón (Banco de Sangre & Tejidos, Barcelona); R. González, A. Richart & L. Barea (Centro de Transfusiones, Madrid); A. Jiménez & L. Blanco (Centro de Hemoterapia y Hemodonación de Castilla y León, Valladolid); A. Suárez & I. Rodríguez-Avial (Hospital Clínico San Carlos, Madrid); P. Parra & M. Fernández (Hospital Universitario 12 de Octubre, Madrid); M. Fernández-Alonso & G. Reina (Clínica Universitaria Navarra, Pamplona); MJ. Echeverría (Hospital Universitario de Donosti); E. Ugalde, MC. Nieto, P. Liendo (Hospital Universitario de Basurto); L. Benítez-Gutiérrez, A. Arias, V. Moreno-Torres, V. Cuervas-Mons & C. de Mendoza (IIS Hospital Universitario Puerta de Hierro, Majadahonda); P. Barreiro (La Paz University Hospital, Madrid); V. Soriano, O. Corral & F. Gómez-Gallego (UNIR Health Sciences School, Madrid).
